# Supplementary material for: Thermodynamics and Spectroscopy of Halogen- and Hydrogen-Bonded Complexes of Haloforms with Aromatic and Aliphatic Amines
Source: MDPI journal article supplement (doi:10.3390/molecules27186124), 2022-09-19
Supplement: s1 [file s1]

# Supporting Information

## for

# Thermodynamics and spectroscopy of halogen- and hydrogen-bonded complexes of haloforms with aromatic and aliphatic amines

Emmanuel Adeniyi,<sup>1</sup> Olivia Grounds,<sup>1</sup> Zachary Stephens,<sup>1</sup> Matthias Zeller,<sup>2</sup> and Sergiy V. Rosokha<sup>1\*</sup>

<sup>1</sup>*Department of Chemistry, Ball State University, Muncie, IN, 47306, USA*

<sup>2</sup>*Department of Chemistry, Purdue University West Lafayette, IN, 47907, USA*

\* Correspondence: svrosokha@bsu.edu

### Content

- Figure S1: UV-Vis spectra of the solutions of CHI<sub>3</sub> and 4-methoxy-N,N-dimethylaniline.
- Figure S2: UV-Vis spectra of the solutions of CHI<sub>3</sub> and 3-methoxy-N,N-dimethylaniline.
- Figure S3: UV-Vis spectra of the solutions of CHI<sub>3</sub> and 4-(dimethylamino)benzonitrile.
- Figure S4: UV-Vis spectra of the solutions of CHI<sub>3</sub> and 3-(dimethylamino)benzonitrile.
- Figure S5: Benesi-Hildebrand plots based on the UV-Vis spectra of solutions of CHI<sub>3</sub> with TMPD and DABCO.
- Figure S6: Fit of spectral changes in solutions of CHI<sub>3</sub> with TMPD and DABCO to 1:1 binding isotherm.
- Figure S7: Dependencies of the chemical shifts of the protons of CHI<sub>3</sub> on the concentration of trimethylamine (TEA), N,N-dimethylaniline (DMA), 4-(dimethylamino)benzonitrile (DMABN), p-bromo-N,N-dimethylaniline (BrDMA) or 3-(N,N-dimethylamino)anisidine (MeODMA).
- Figure S8: Dependencies of the chemical shifts of the protons of CHBr<sub>3</sub> on the concentration of TEA, DMA, DMABN, BrDMA and MeODMA.
- Figure S9: Dependencies of the chemical shifts of the protons of CHCl<sub>3</sub> on the concentration of TEA, DMA, DMABN, BrDMA and MeODMA.
- Figure S10. Effect of variation of interatomic H...N and X...N separations on the energy of HyB and HaB complexes and chemical shifts of the haloforms' protons.
- Figure S11. Alternative structure of HaB complex between CHI<sub>3</sub> and TMPD.
- Table S1. Values of V<sub>max</sub> on the surfaces of individual and polarized haloforms.
- Table S2. Crystallographic, data collection and refinement details.
- Table S3: Energies of the HyB and HaB complexes and their components.
- Table S4. Atomic coordinate of the HYB and HaB complexes of haloforms with DABCO and TMPD

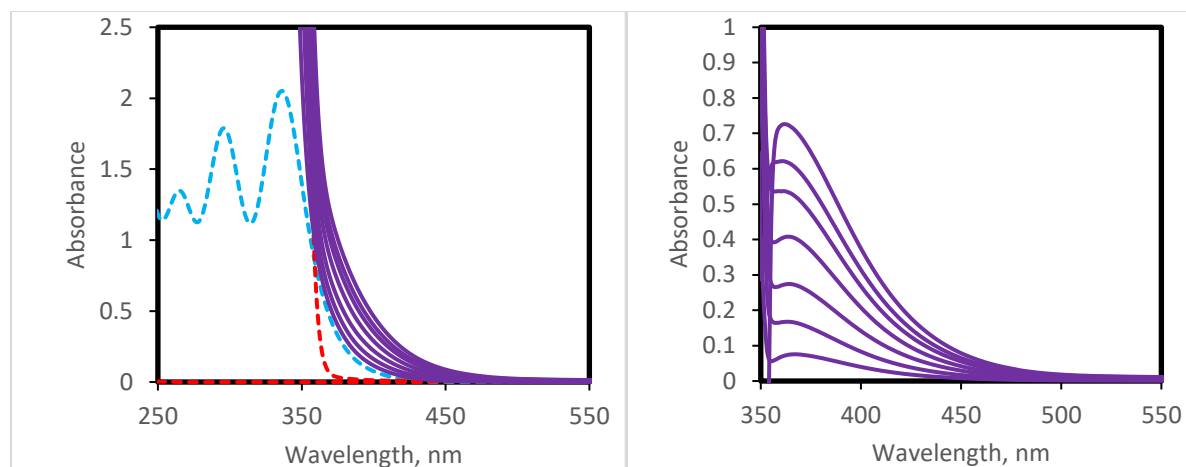

**Figure S1.** (Left) Spectra of the solutions with constant concentration of  $\text{CHI}_3$  and various concentrations of p-methoxy-N,N-dimethylaniline (pMeODMA). Spectra of the solutions of individual reactants are shown as dashed blue ( $\text{CHI}_3$ ) or red (pMeODMA) lines. (Right): Spectra of the complexes obtained by subtraction of the absorption of components from the spectra of their mixtures

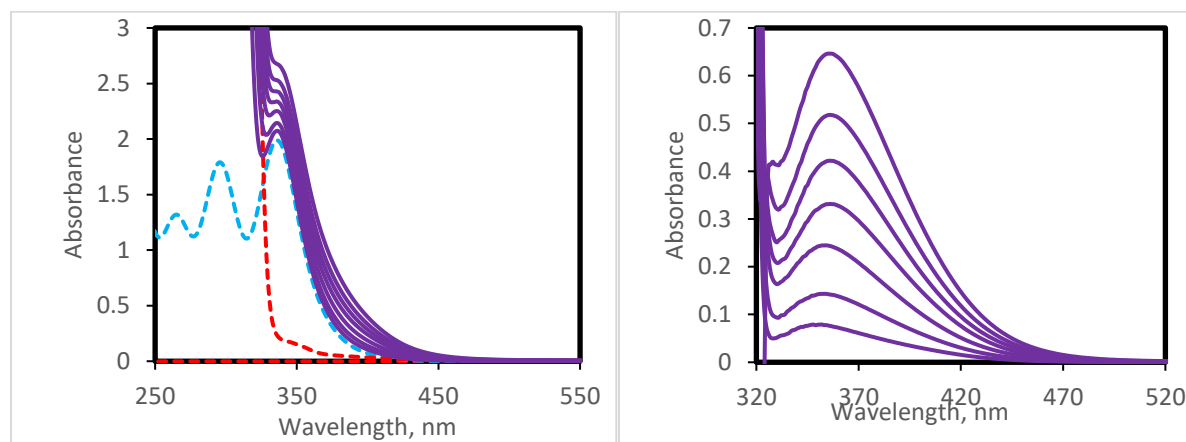

**Figure S2.** (Left) Spectra of the solutions with constant concentration of  $\text{CHI}_3$  and various concentrations of m-methoxy-N,N-dimethylaniline (mMeODMA). Spectra of the solutions of individual reactants are shown as dashed blue ( $\text{CHI}_3$ ) or red (mMeODMA) lines. (Right): Spectra of the complexes obtained by subtraction of the absorption of components from the spectra of their mixtures

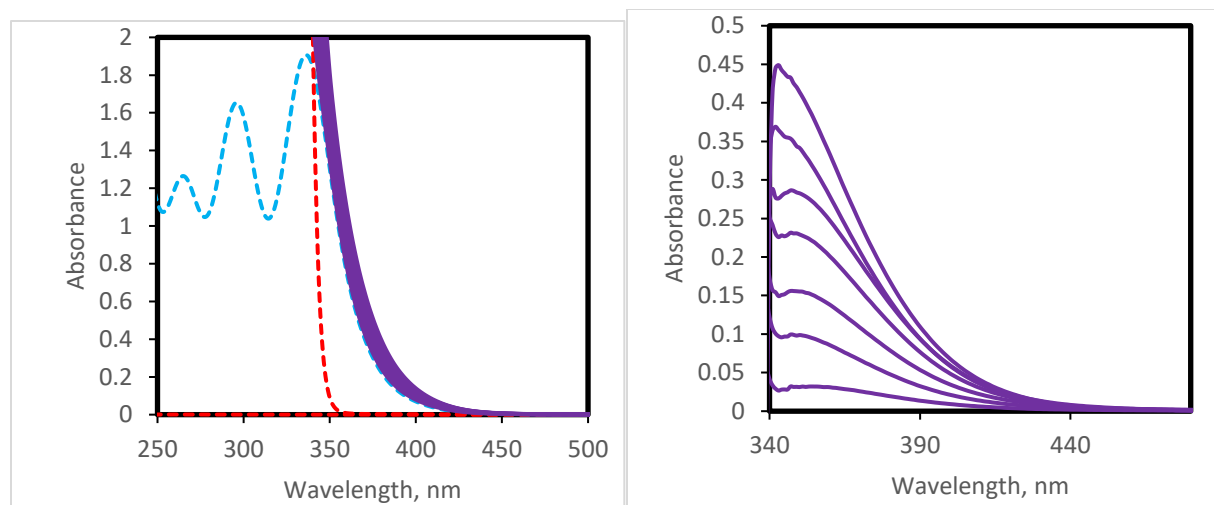

**Figure S3.** (Left) Spectra of the solutions with constant concentration of  $\text{CHI}_3$  and various concentrations of p-cyano-N,N-dimethylaniline (DMACN). Spectra of the solutions of individual reactants are shown as dashed blue ( $\text{CHI}_3$ ) or red (DMACN) lines. (Right): Spectra of the complexes obtained by subtraction of the absorption of components from the spectra of their mixtures

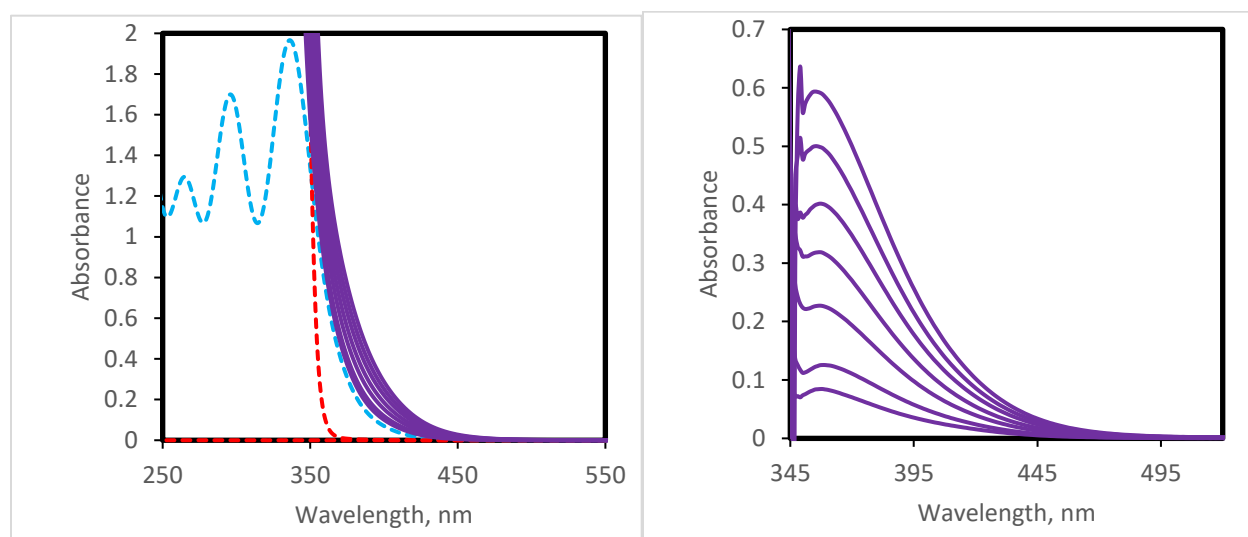

**Figure S4.** (Left) Spectra of the solutions with constant concentration of  $\text{CHI}_3$  and various concentrations of p-bromo-N,N-dimethylaniline (DMABr). Spectra of the solutions of individual reactants are shown as dashed blue ( $\text{CHI}_3$ ) or red (DMABr) lines. (Right): Spectra of the complexes obtained by subtraction of the absorption of components from the spectra of their mixtures

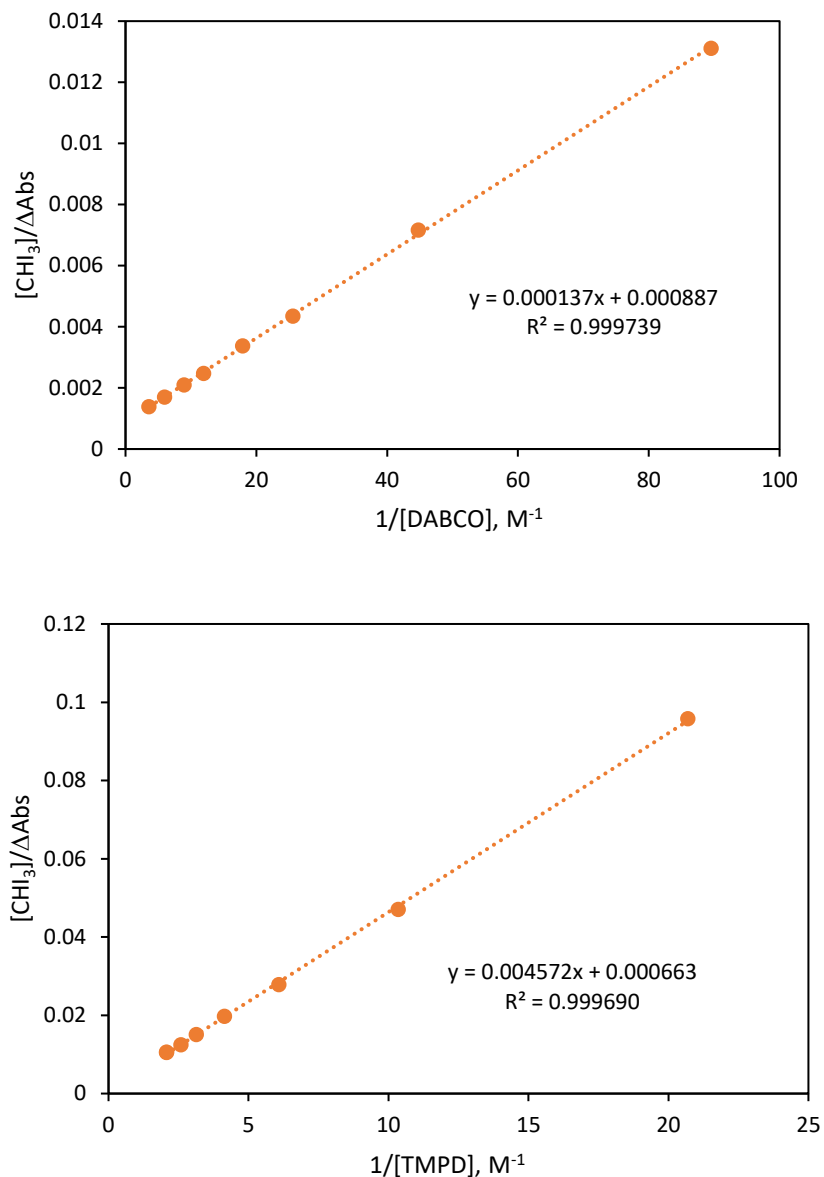

**Figure S5.** Benesi-Hilderbrandt plots  $C_D^o / Abs = 1/(\epsilon l) + \{1/(K^{eff} \epsilon l)\} \times 1/[C_A^o]$  (where  $C_D^o$  and  $C_A^o$  are initial concentrations of  $CHX_3$  and amine, respectively,  $\epsilon$  and  $l$  are extinction coefficient of the complex and the length of the cell which was used in the UV-Vis measurements,  $K^{eff}$  is the effective formation constant of the complex and  $\Delta Abs$  is the absorbance of the complex at certain wavelength (obtained by subtraction of the absorption of the components from the spectra of the mixtures), based on the treatments of spectra measured in solution of  $CHI_3$  with DABCO (top) and TMPD (bottom).

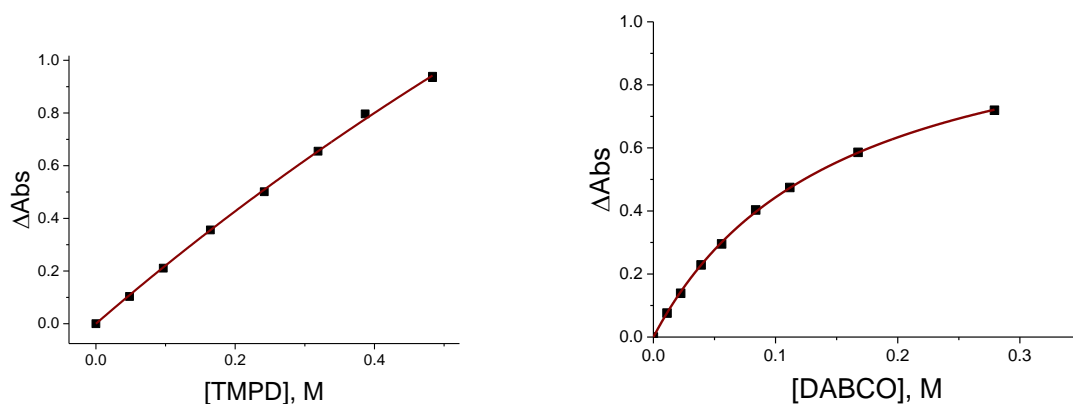

**Figure S6.** The fit (using Origin 16) of the UV-Vis spectral data of the solutions containing constant concentrations of  $\text{CHI}_3$  and variable concentrations of TMPD (left) or DABCO (right) to 1:1 binding isotherm as  $\Delta\text{Abs} = \epsilon l \times C_{\text{com}} = \epsilon l \times \{ (C_{\text{A}}^0 + C_{\text{D}}^0 + 1/K_{\text{eff}}) - ((C_{\text{A}}^0 + C_{\text{D}}^0 + 1/K_{\text{eff}})^2 - 4C_{\text{A}}^0 C_{\text{D}}^0)^{0.5} \} / 2$ , where  $\Delta\text{Abs}$  is the absorbance of the complex at certain wavelength (obtained by subtraction of the absorption of the components from the spectra of the mixtures),  $C_{\text{com}}$  is the concentration of the complex, and  $C_{\text{D}}^0$  and  $C_{\text{A}}^0$  are initial concentrations of  $\text{CHX}_3$  and amine,  $\epsilon$  and  $l$  are extinction coefficient of the complex and the length of the cell which was used in the UV-Vis measurements, and  $K_{\text{eff}}$  is the effective formation constant of the complex.

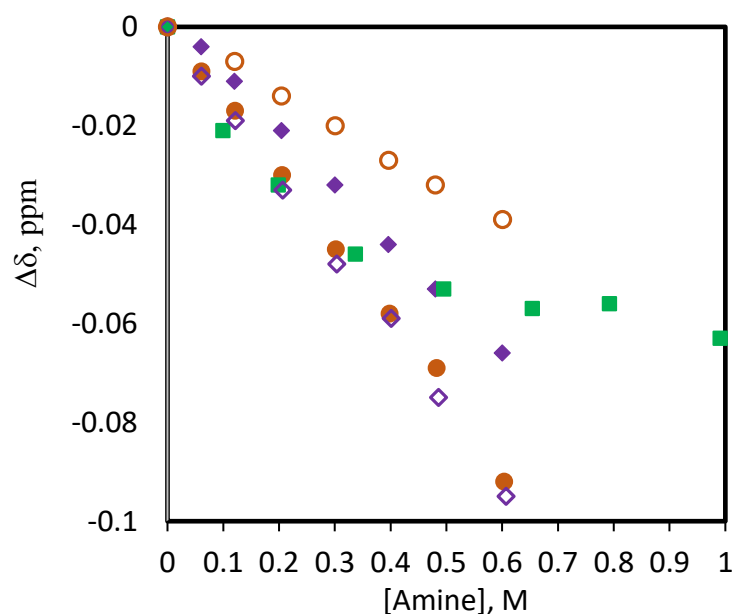

**Figure S7.** Dependencies of the chemical shifts of the protons of  $\text{CHI}_3$  (as compared to that in the corresponding isolated molecules) on the concentration of added trimethylamine (TEA) (■), DMA (●), DMACN (○), DMABr (◆) or mMeODMA (◇) (in  $\text{CD}_3\text{CN}$ ,  $22^\circ\text{C}$ ).

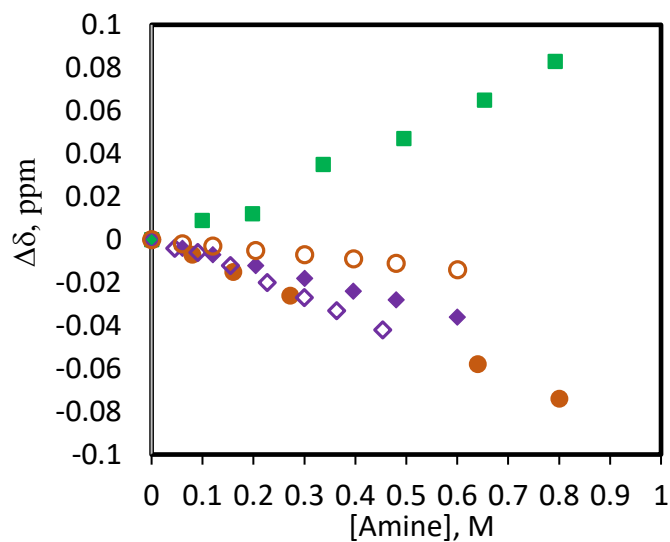

**Figure S8.** Dependencies of the chemical shifts of the protons of  $\text{CHBr}_3$  as compared to that in the corresponding isolated molecules) on the concentration of added TEA (■), DMA (●), DMACN (○), DMABr (◆) or mMeODMA (◇) (in  $\text{CD}_3\text{CN}$ ,  $22^\circ\text{C}$ ).

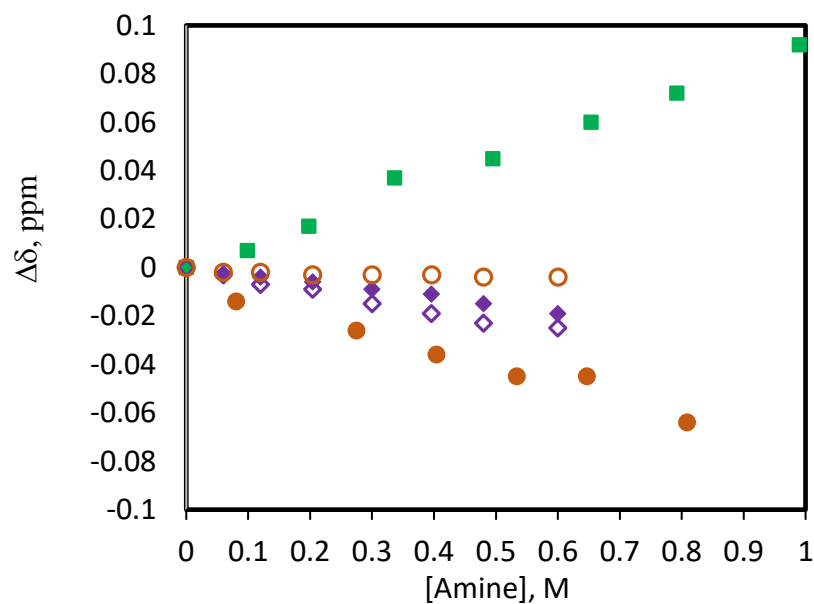

**Figure S9.** Dependencies of the chemical shifts of the protons of  $\text{CHCl}_3$  as compared to that in the corresponding isolated molecules) on the concentration of added TEA (■), DMA (●), DMACN (○), DMABr (◆) or mMeODMA (◇) (in  $\text{CD}_3\text{CN}$ ,  $22^\circ\text{C}$ ).

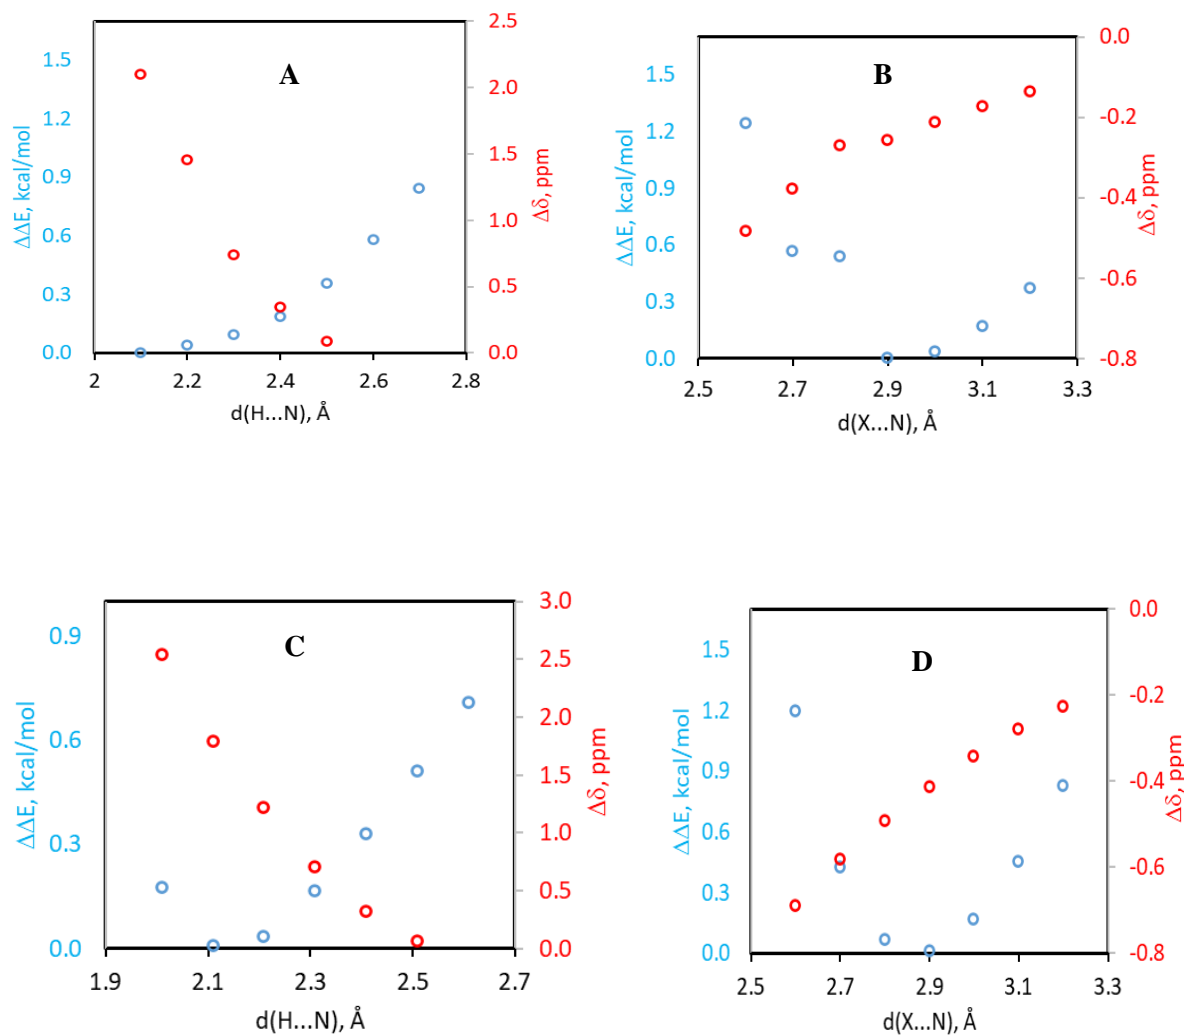

**Figure S10.** Effect of variations of interatomic H...N and X...N separations on the energies of HyB and HaB complexes (blue circle) relative to that of the energy minimum and the shift of the proton signal in their NMR spectra (red circles) relative to that in the individual  $\text{CHX}_3$  for: A) HyB complexes of  $\text{CHCl}_3$  with DABCO, B) HaB complexes of  $\text{CHCl}_3$  with DABCO, C) HyB complexes of  $\text{CHBr}_3$  with TMPD, D) HaB complexes of  $\text{CHBr}_3$  with TMPD.

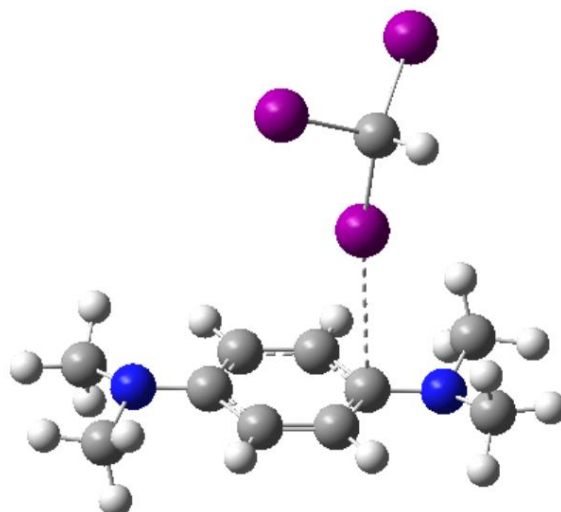

**Figure S11.** Alternative structure of the HaB complex between  $\text{CHI}_3$  and TMPD showing I...C bonding ( $d_{\text{I}\cdots\text{C}} = 3.35 \text{ \AA}$ ,  $\Delta E = -4.3 \text{ kcal/mol}$ , chemical shift relative to that of the individual  $\text{CHI}_3$   $\Delta\Delta\delta = -0.55 \text{ ppm}$  and absorption band with  $\lambda_{\text{max}} = 392 \text{ nm}$  and  $\varepsilon = 2900 \text{ M}^{-1} \text{ cm}^{-1}$ ).

**Table S1.** Values of  $V_{\text{max}}$  on the surfaces of halogen ( $V^{\text{X}}$ ) and hydrogen ( $V^{\text{H}}$ ) atoms (at 0.001 a.u. electron density) in the individual haloforms and in the molecules polarized by the presence of electron rich center nearby halogen (in HaB complex) or hydrogen (in HyB complex) atoms.

| Molecule                      | $V_{\text{max}}^{\text{H}}$ , a.u. | $V_{\text{max}}^{\text{X}}$ , a.u. |
|-------------------------------|------------------------------------|------------------------------------|
| $\text{CHI}_3$ (Ind)          | 0.0541                             | 0.0425                             |
| $\text{CHI}_3$ (HaB complex)  | 0.0434                             | 0.124                              |
| $\text{CHI}_3$ (HyB complex)  | 0.108                              | 0.0334                             |
| $\text{CHBr}_3$ (Ind)         | 0.0611                             | 0.0302                             |
| $\text{CHBr}_3$ (HaB complex) | 0.0528                             | 0.0828                             |
| $\text{CHBr}_3$ (HyB complex) | 0.108                              | 0.0181                             |
| $\text{CHCl}_3$ (Ind)         | 0.0624                             | 0.02                               |
| $\text{CHCl}_3$ (HaB complex) | 0.055                              | 0.055                              |
| $\text{CHCl}_3$ (HyB complex) | 0.103                              | 0.0141                             |



**Table S2.** Crystallographic, data collection and refinement details.

|                                                                                                                | CHI <sub>3</sub> ·DABCO                                                                                            | 2CHI <sub>3</sub> ·TMPD                                                                                            | CHI <sub>3</sub> ·TMPD                                                                                             |
|----------------------------------------------------------------------------------------------------------------|--------------------------------------------------------------------------------------------------------------------|--------------------------------------------------------------------------------------------------------------------|--------------------------------------------------------------------------------------------------------------------|
| Chemical formula                                                                                               | C <sub>6</sub> H <sub>12</sub> N <sub>2</sub> ·CHI <sub>3</sub>                                                    | C <sub>10</sub> H <sub>16</sub> N <sub>2</sub> ·2(CHI <sub>3</sub> )                                               | C <sub>13</sub> H <sub>20</sub> I <sub>3</sub> N <sub>3</sub>                                                      |
| <i>M<sub>r</sub></i>                                                                                           | 505.89                                                                                                             | 951.68                                                                                                             | 599.02                                                                                                             |
| Crystal system, space group                                                                                    | Orthorhombic, <i>Pnma</i>                                                                                          | Triclinic, <i>P</i> 1                                                                                              | Orthorhombic, <i>Pnma</i>                                                                                          |
| Temperature (K)                                                                                                | 150                                                                                                                | 150                                                                                                                | 150                                                                                                                |
| <i>a</i> , <i>b</i> , <i>c</i> (Å)                                                                             | 16.4635 (13), 10.6079 (9), 7.3574 (6)                                                                              | 6.6114 (3), 9.6487 (5), 9.8861 (5)                                                                                 | 10.5562 (5), 15.1118 (6), 11.6277 (5)                                                                              |
| $\alpha$ , $\beta$ , $\gamma$ (°)                                                                              |                                                                                                                    | 63.578 (2), 83.094 (3), 74.633 (3)                                                                                 | 1854.89 (14)                                                                                                       |
| <i>V</i> (Å <sup>3</sup> )                                                                                     | 1284.92 (18)                                                                                                       | 544.58 (5)                                                                                                         | 4                                                                                                                  |
| <i>Z</i>                                                                                                       | 4                                                                                                                  | 1                                                                                                                  | Mo <i>K</i> α                                                                                                      |
| Radiation type                                                                                                 | Mo <i>K</i> α                                                                                                      | Mo <i>K</i> α                                                                                                      | 5.05                                                                                                               |
| $\mu$ (mm <sup>-1</sup> )                                                                                      | 7.26                                                                                                               | 8.55                                                                                                               | 0.32 × 0.25 × 0.16                                                                                                 |
| Crystal size (mm)                                                                                              | 0.25 × 0.23 × 0.18                                                                                                 | 0.21 × 0.20 × 0.13                                                                                                 | C <sub>13</sub> H <sub>20</sub> I <sub>3</sub> N <sub>3</sub>                                                      |
| Diffractometer                                                                                                 | Bruker AXS D8 Quest CMOS diffractometer                                                                            | Bruker AXS D8 Quest diffractometer with PhotonII charge-integrating pixel array detector (CPAD)                    | Bruker AXS D8 Quest diffractometer with PhotonII charge-integrating pixel array detector (CPAD)                    |
| Absorption correction                                                                                          | Multi-scan SADABS 2016/2: Krause, L., Herbst-Irmer, R., Sheldrick G.M. & Stalke D., J. Appl. Cryst. 48 (2015) 3-10 | Multi-scan SADABS 2016/2: Krause, L., Herbst-Irmer, R., Sheldrick G.M. & Stalke D., J. Appl. Cryst. 48 (2015) 3-10 | Multi-scan SADABS 2016/2: Krause, L., Herbst-Irmer, R., Sheldrick G.M. & Stalke D., J. Appl. Cryst. 48 (2015) 3-10 |
| <i>T</i> <sub>min</sub> , <i>T</i> <sub>max</sub>                                                              | 0.432, 0.747                                                                                                       | 0.500, 0.747                                                                                                       | 0.539, 0.747                                                                                                       |
| No. of measured, independent and observed [ <i>I</i> > 2σ( <i>I</i> )] reflections                             | 13583, 3209, 2702                                                                                                  | 13429, 4038, 3603                                                                                                  | 52270, 3646, 3302                                                                                                  |
| <i>R</i> <sub>int</sub>                                                                                        | 0.040                                                                                                              | 0.037                                                                                                              | 0.043                                                                                                              |
| (sin θ/λ) <sub>max</sub> (Å <sup>-1</sup> )                                                                    | 0.833                                                                                                              | 0.771                                                                                                              | 0.769                                                                                                              |
| <i>R</i> [ <i>F</i> <sup>2</sup> > 2σ( <i>F</i> <sup>2</sup> )], <i>wR</i> ( <i>F</i> <sup>2</sup> ), <i>S</i> | 0.037, 0.082, 1.06                                                                                                 | 0.022, 0.046, 1.05                                                                                                 | 0.013, 0.028, 1.06                                                                                                 |
| No. of reflections                                                                                             | 3209                                                                                                               | 4038                                                                                                               | 3646                                                                                                               |
| No. of parameters                                                                                              | 65                                                                                                                 | 94                                                                                                                 | 98                                                                                                                 |
| H-atom treatment                                                                                               | H-atom parameters constrained                                                                                      | H-atom parameters constrained                                                                                      | H-atom parameters constrained                                                                                      |
| Δ <sub>max</sub> , Δ <sub>min</sub> (e Å <sup>-3</sup> )                                                       | 2.58, -2.25                                                                                                        | 1.79, -1.73                                                                                                        | 0.50, -0.43                                                                                                        |

Computer programs: Apex3 v2016.9-0 (Bruker, 2016), SAINT V8.37A (Bruker, 2016), SHELXS97 (Sheldrick, 2008), SHELXL2017/1 (Sheldrick, 2015, 2016), SHELXLE Rev714 (Hübschle *et al.*, 2011).

**Table S3.** Energies of the HyB and HaB complexes between CHX<sub>3</sub> and amines resulting from the M06-2X/def-TZVPP computations (acetonitrile).

| CHX <sub>3</sub>  | Amine | Energy + ZPE, Hartree |              | BSSE, Hartree |             | $\Delta E$ , kcal/mol <sup>a</sup> |      |
|-------------------|-------|-----------------------|--------------|---------------|-------------|------------------------------------|------|
|                   |       | HaB complex           | HyB complex  | HaB complex   | HyB complex | HaB                                | HyB  |
| CHI <sub>3</sub>  | DABCO | -1276.702449          | -1276.698772 | 0.000676      | 0.000626    | -7.0                               | -4.7 |
|                   | TMPD  | -1431.471322          | -1431.471276 | 0.000619      | 0.000635    | -5.5                               | -5.5 |
| CHBr <sub>3</sub> | DABCO | -8106.386286          | -8106.387885 | 0.000667      | 0.000793    | -3.5                               | -4.4 |
|                   | TMPD  | -8261.157135          | -8261.159697 | 0.000649      | 0.000902    | -3.3                               | -4.7 |
| CHCl <sub>3</sub> | DABCO | -1764.400973          | -1764.404661 | 0.000553      | 0.000832    | -1.8                               | -4.0 |
|                   | TMPD  | -1919.172264          | -1919.176305 | 0.000583      | 0.000940    | -1.9                               | -4.2 |

a)  $\Delta E = E_{\text{comp}} - (E_{\text{CHX}_3} + E_{\text{D}}) + \text{BSSE}$  where  $E_{\text{comp}}$ ,  $E_{\text{CHX}_3}$  and  $E_{\text{A}}$  are sums of the electronic and ZPE of the complex, CHX<sub>3</sub> and amine and BSSE is a basis set superposition error. Energies of the individual molecules

| Amines | Energy+ZPE, Hartree | CHX <sub>3</sub>  | Energy+ZPE, Hartree |
|--------|---------------------|-------------------|---------------------|
| TMPD   | -499.89700337       | CHI <sub>3</sub>  | -931.564856         |
| DABCO  | -345.125783         | CHBr <sub>3</sub> | -7761.254232        |
|        |                     | CHCl <sub>3</sub> | -1419.271718        |

**Table S4.** Atomic coordinates of the optimized HyB and HaB complexes between CHX<sub>3</sub> and amines (from the M06-2X/def-TZVPP computations in acetonitrile)

| CHI <sub>3</sub> -TMPD (HyB) |             |             |             | CHI <sub>3</sub> -TMPD(HaB) |            |             |             |
|------------------------------|-------------|-------------|-------------|-----------------------------|------------|-------------|-------------|
| C                            | -2.50128400 | 2.11661400  | 0.00105700  | C                           | 4.03883200 | -1.62919400 | -0.19174400 |
| C                            | -1.57644800 | 1.66757400  | 0.93943400  | C                           | 3.08456700 | -1.09818500 | 0.67069100  |
| C                            | -1.84988200 | 0.44981200  | 1.56934800  | C                           | 3.22299400 | 0.24679500  | 1.02451500  |
| C                            | -2.98718700 | -0.28073700 | 1.28251700  | C                           | 4.27124500 | 1.01682000  | 0.55981500  |
| C                            | -3.92871500 | 0.17240400  | 0.34032300  | C                           | 5.25125200 | 0.48036800  | -0.29605500 |
| C                            | -3.64249300 | 1.38379000  | -0.30202000 | C                           | 5.09028700 | -0.85828700 | -0.67424200 |
| H                            | -2.33789800 | 3.04428000  | -0.52837300 | H                           | 3.97917900 | -2.65897200 | -0.51215900 |
| H                            | -1.14420900 | 0.04616100  | 2.28556800  | H                           | 2.48246800 | 0.71350100  | 1.66084500  |
| H                            | -3.13230400 | -1.22035500 | 1.79379500  | H                           | 4.31687700 | 2.05175200  | 0.86281100  |
| H                            | -4.31236000 | 1.77723500  | -1.05140100 | H                           | 5.79099000 | -1.32516000 | -1.34950300 |
| N                            | -5.08760500 | -0.54463100 | 0.07146100  | N                           | 6.32508800 | 1.24121100  | -0.73356300 |
| N                            | -0.35376200 | 2.33474300  | 1.20942500  | N                           | 1.96788000 | -1.84137200 | 1.14817600  |
| C                            | -5.12405000 | -1.93910000 | 0.46701900  | C                           | 6.23505500 | 2.68233100  | -0.60525900 |
| H                            | -6.07235200 | -2.36821000 | 0.15593600  | H                           | 7.13594900 | 3.12864900  | -1.01659600 |
| H                            | -4.31083000 | -2.52405900 | 0.01907800  | H                           | 5.36694700 | 3.09795600  | -1.13153100 |
| H                            | -5.05743100 | -2.03788800 | 1.55001500  | H                           | 6.17043200 | 2.97594700  | 0.44216400  |
| C                            | -5.83127600 | -0.19567400 | -1.12220800 | C                           | 7.10536200 | 0.73429900  | -1.84404600 |
| H                            | -6.69302600 | -0.85196500 | -1.20493100 | H                           | 7.89146300 | 1.44694600  | -2.07677800 |
| H                            | -6.20004900 | 0.82791300  | -1.06264700 | H                           | 7.58196000 | -0.21031900 | -1.58280100 |
| H                            | -5.22940600 | -0.28969500 | -2.03518200 | H                           | 6.49974000 | 0.57386700  | -2.74481900 |
| C                            | -0.12423600 | 2.66694500  | 2.61081600  | C                           | 1.81076300 | -1.83606200 | 2.60140800  |
| H                            | 0.91328100  | 2.97331000  | 2.73885500  | H                           | 0.85120600 | -2.28568000 | 2.85384100  |
| H                            | -0.77488100 | 3.48689500  | 2.94285700  | H                           | 2.60881300 | -2.40746400 | 3.09043400  |
| H                            | -0.30513500 | 1.80404700  | 3.24553000  | H                           | 1.82115700 | -0.82053000 | 2.98603300  |

|                               |             |             |             |                               |             |             |             |
|-------------------------------|-------------|-------------|-------------|-------------------------------|-------------|-------------|-------------|
| C                             | -0.03044500 | 3.44703500  | 0.33726400  | C                             | 1.83287300  | -3.18625400 | 0.61413700  |
| H                             | 0.98395200  | 3.77629800  | 0.55671800  | H                             | 0.89298900  | -3.60580000 | 0.96921300  |
| H                             | -0.07136600 | 3.12860500  | -0.70432600 | H                             | 1.80648300  | -3.15617000 | -0.47398400 |
| H                             | -0.70612600 | 4.30326900  | 0.47122800  | H                             | 2.64946000  | -3.84617800 | 0.93265000  |
| C                             | 1.20460200  | -0.17745600 | 0.00075000  | C                             | -2.13490500 | 0.38666700  | -0.61688200 |
| H                             | 0.64941700  | 0.50756900  | 0.63144500  | H                             | -1.89526400 | 0.77196100  | -1.59787300 |
| I                             | 1.33638000  | -2.03381500 | 1.03579800  | I                             | -0.36771600 | -0.54943300 | 0.16219700  |
| I                             | 3.10101600  | 0.75706700  | -0.27202300 | I                             | -3.73270600 | -0.99934600 | -0.91601500 |
| I                             | 0.09541100  | -0.32290200 | -1.81124900 | I                             | -2.74583400 | 2.07936500  | 0.53366200  |
| CHBr <sub>3</sub> -TMPD (HyB) |             |             |             | CHBr <sub>3</sub> -TMPD (HaB) |             |             |             |
| C                             | -1.98135200 | 1.92281000  | -0.57393700 | C                             | -3.31674500 | 1.63856500  | -0.30699700 |
| C                             | -1.09686600 | 1.72540100  | 0.48213500  | C                             | -2.32496900 | 1.16970200  | 0.55126700  |
| C                             | -1.39242300 | 0.69308200  | 1.37631400  | C                             | -2.47435100 | -0.13210100 | 1.04071100  |
| C                             | -2.51342400 | -0.10091900 | 1.22824300  | C                             | -3.56359300 | -0.91465800 | 0.70967500  |
| C                             | -3.41394300 | 0.09738000  | 0.16553300  | C                             | -4.57820700 | -0.43809400 | -0.14054200 |
| C                             | -3.10571000 | 1.12275100  | -0.73775700 | C                             | -4.40936700 | 0.85225300  | -0.65563300 |
| H                             | -1.79854800 | 2.69787900  | -1.30434300 | H                             | -3.25350000 | 2.63142200  | -0.72812000 |
| H                             | -0.71357500 | 0.48438500  | 2.19429000  | H                             | -1.70856400 | -0.55598900 | 1.67692500  |
| H                             | -2.67668900 | -0.89186400 | 1.94447900  | H                             | -3.61387200 | -1.91422100 | 1.11416800  |
| H                             | -3.74402800 | 1.31419300  | -1.58686300 | H                             | -5.13673400 | 1.27059800  | -1.33465700 |
| N                             | -4.55525100 | -0.68210100 | 0.02837100  | N                             | -5.69440700 | -1.20960000 | -0.44247200 |
| N                             | 0.11241200  | 2.45485400  | 0.63603000  | N                             | -1.17374300 | 1.92272400  | 0.88742900  |
| C                             | -4.60345100 | -1.93951600 | 0.74893100  | C                             | -5.61521700 | -2.63627300 | -0.19723100 |
| H                             | -5.53449600 | -2.44581700 | 0.51023700  | H                             | -6.54688500 | -3.09883900 | -0.51084700 |
| H                             | -3.76789400 | -2.60284600 | 0.49228900  | H                             | -4.78833500 | -3.11181000 | -0.73953200 |
| H                             | -4.58638300 | -1.77184000 | 1.82533800  | H                             | -5.48757900 | -2.84138500 | 0.86518500  |
| C                             | -5.24445100 | -0.64540900 | -1.24585100 | C                             | -6.51261600 | -0.79552600 | -1.56431000 |
| H                             | -6.09704900 | -1.31738500 | -1.20465600 | H                             | -7.32724500 | -1.50385000 | -1.68654400 |
| H                             | -5.62222700 | 0.35546500  | -1.45265500 | H                             | -6.95181000 | 0.18486000  | -1.38162700 |
| H                             | -4.59966900 | -0.94705200 | -2.08117900 | H                             | -5.94641500 | -0.74654700 | -2.50324400 |
| C                             | 0.25485900  | 3.13996500  | 1.91643200  | C                             | -0.89514700 | 2.04019800  | 2.31307500  |
| H                             | 1.27936700  | 3.49498400  | 2.01966400  | H                             | 0.10391300  | 2.45450400  | 2.44528700  |
| H                             | -0.42296300 | 4.00084000  | 1.98903600  | H                             | -1.61697400 | 2.69889100  | 2.81333400  |
| H                             | 0.04335000  | 2.46324500  | 2.73941200  | H                             | -0.92220800 | 1.06686100  | 2.79412300  |
| C                             | 0.47246200  | 3.32038900  | -0.47107800 | C                             | -1.01660400 | 3.19188400  | 0.20594200  |
| H                             | 1.47268600  | 3.71236000  | -0.29433500 | H                             | -0.03756000 | 3.59907900  | 0.45439300  |
| H                             | 0.48260900  | 2.75222500  | -1.40101700 | H                             | -1.06407800 | 3.04745900  | -0.87245800 |
| H                             | -0.21326000 | 4.17108200  | -0.58607700 | H                             | -1.77900200 | 3.92740100  | 0.49673200  |
| C                             | 1.59416800  | -0.31693800 | -0.01764700 | C                             | 2.63916100  | -0.60291600 | -0.58444300 |
| H                             | 1.15017200  | 0.57930300  | 0.40462700  | H                             | 2.35454800  | -1.18304800 | -1.44966200 |
| Br                            | 1.58185300  | -1.69123200 | 1.33638400  | Br                            | 3.22268200  | -1.85380000 | 0.76837100  |
| Br                            | 0.52726300  | -0.81774300 | -1.54374200 | Br                            | 1.09766900  | 0.40751800  | -0.00231000 |
| Br                            | 3.39457700  | 0.14976400  | -0.53798300 | Br                            | 4.08551300  | 0.55612700  | -1.13169600 |
| CHCl <sub>3</sub> -TMPD (HyB) |             |             |             | CHCl <sub>3</sub> -TMPD (HaB) |             |             |             |
| C                             | -1.08545100 | 1.70398500  | -0.79175900 | C                             | -2.15301000 | 1.63525800  | -0.54977700 |
| C                             | -0.21799500 | 1.50518600  | 0.27829300  | C                             | -1.11957400 | 1.26555200  | 0.30987800  |

|                                |             |             |             |                                |             |             |             |
|--------------------------------|-------------|-------------|-------------|--------------------------------|-------------|-------------|-------------|
| C                              | -0.61950500 | 0.59976600  | 1.26397100  | C                              | -1.28189000 | 0.06365500  | 1.00908700  |
| C                              | -1.82722100 | -0.06792600 | 1.19265000  | C                              | -2.41677000 | -0.71270200 | 0.87225300  |
| C                              | -2.71259900 | 0.13680000  | 0.11849000  | C                              | -3.46913600 | -0.33333100 | 0.02009800  |
| C                              | -2.29707600 | 1.02886000  | -0.87855700 | C                              | -3.29158000 | 0.85160100  | -0.70236100 |
| H                              | -0.82252800 | 2.38081700  | -1.59204300 | H                              | -2.08659900 | 2.54653400  | -1.12602900 |
| H                              | 0.04098500  | 0.38906600  | 2.09645100  | H                              | -0.49192100 | -0.29175900 | 1.65692400  |
| H                              | -2.07246800 | -0.76483900 | 1.97963500  | H                              | -2.47318700 | -1.63270500 | 1.43418300  |
| H                              | -2.91885600 | 1.21315200  | -1.74141500 | H                              | -4.04812200 | 1.19051000  | -1.39376100 |
| N                              | -3.94050300 | -0.50873600 | 0.05845500  | N                              | -4.63036100 | -1.09422900 | -0.08590000 |
| N                              | 1.06674300  | 2.10451200  | 0.36606100  | N                              | 0.07191300  | 2.01039500  | 0.44255900  |
| C                              | -4.13484700 | -1.67149600 | 0.90227100  | C                              | -4.57303700 | -2.47129300 | 0.36442700  |
| H                              | -5.12484900 | -2.07862600 | 0.71711800  | H                              | -5.53788900 | -2.93890000 | 0.18841700  |
| H                              | -3.39213000 | -2.45674300 | 0.71363800  | H                              | -3.80165400 | -3.05327100 | -0.15587300 |
| H                              | -4.08235300 | -1.39983900 | 1.95615900  | H                              | -4.37353500 | -2.52224200 | 1.43420500  |
| C                              | -4.63935800 | -0.50911200 | -1.21092600 | C                              | -5.49923700 | -0.83081000 | -1.21517700 |
| H                              | -5.56505600 | -1.06743400 | -1.10339600 | H                              | -6.34583100 | -1.51064800 | -1.17444300 |
| H                              | -4.89861900 | 0.50607900  | -1.51021600 | H                              | -5.88990500 | 0.18546400  | -1.17375900 |
| H                              | -4.04768300 | -0.96240800 | -2.01639400 | H                              | -4.98989800 | -0.96201700 | -2.17872000 |
| C                              | 1.29193000  | 2.88939200  | 1.57539100  | C                              | 0.50658400  | 2.28605000  | 1.80372300  |
| H                              | 2.34984100  | 3.13780900  | 1.64851100  | H                              | 1.52302200  | 2.67740200  | 1.77764300  |
| H                              | 0.71354000  | 3.82280500  | 1.56198100  | H                              | -0.13981300 | 3.02467300  | 2.29646900  |
| H                              | 1.01218300  | 2.32244200  | 2.45874700  | H                              | 0.51386300  | 1.37964400  | 2.40179600  |
| C                              | 1.51324500  | 2.81592000  | -0.81660900 | C                              | 0.21008700  | 3.16777100  | -0.41566500 |
| H                              | 2.55323400  | 3.10579700  | -0.67579400 | H                              | 1.21722800  | 3.56556400  | -0.30116700 |
| H                              | 1.44979000  | 2.16658800  | -1.68932500 | H                              | 0.07183000  | 2.88312900  | -1.45778700 |
| H                              | 0.92831100  | 3.72531100  | -1.01195900 | H                              | -0.50460100 | 3.96701300  | -0.17356100 |
| C                              | 2.16194200  | -0.89248500 | -0.07565700 | C                              | 3.47654500  | -0.97417700 | -0.63478600 |
| H                              | 1.88788300  | 0.08208100  | 0.31756000  | H                              | 3.24265800  | -1.46755300 | -1.56772000 |
| Cl                             | 3.86229400  | -0.82264900 | -0.54963600 | Cl                             | 2.18866200  | 0.17183100  | -0.26614300 |
| Cl                             | 1.91136300  | -2.11030500 | 1.17661700  | Cl                             | 3.59362000  | -2.21257200 | 0.61934600  |
| Cl                             | 1.13850300  | -1.21562400 | -1.47558200 | Cl                             | 5.02298900  | -0.14393400 | -0.83282700 |
| CHBr <sub>3</sub> -DABCO (HyB) |             |             |             | CHBr <sub>3</sub> -DABCO (HaB) |             |             |             |
| C                              | -1.22279200 | 0.00045700  | 0.08015600  | C                              | 2.18262800  | -0.00010400 | -0.56732600 |
| N                              | 1.85197500  | 0.08602100  | 0.40700900  | N                              | -2.52276100 | -0.01376500 | -0.02562200 |
| C                              | 2.16656300  | 0.60389700  | -0.93149800 | C                              | -3.08030000 | 1.03518400  | -0.88396400 |
| C                              | 2.59312000  | 0.86822800  | 1.40397700  | C                              | -3.06829800 | -1.31072500 | -0.43556200 |
| C                              | 2.28103500  | -1.31689800 | 0.48571800  | C                              | -2.90274200 | 0.25035000  | 1.36489500  |
| N                              | 4.36400500  | -0.09053400 | -0.03407200 | N                              | -5.06516800 | 0.01369500  | 0.18441200  |
| H                              | 1.52899200  | 0.09715100  | -1.65833700 | H                              | -2.60108700 | 1.98093500  | -0.62736100 |
| H                              | 1.91307700  | 1.66475500  | -0.94720500 | H                              | -2.82119600 | 0.79697800  | -1.91659800 |
| H                              | 2.19489000  | 1.88330500  | 1.41418700  | H                              | -2.70598400 | -1.53460900 | -1.43980000 |
| H                              | 2.40865900  | 0.42466000  | 2.38305200  | H                              | -2.67370100 | -2.07022400 | 0.24079500  |
| H                              | 1.94565000  | -1.72928800 | 1.43807900  | H                              | -2.41065400 | -0.48542100 | 2.00227600  |
| H                              | 1.77757900  | -1.86450500 | -0.31264000 | H                              | -2.52276800 | 1.23648400  | 1.63545000  |
| C                              | 3.67112900  | 0.37650800  | -1.23961500 | C                              | -4.62014500 | 1.10589300  | -0.68733100 |
| H                              | 4.14530700  | 1.29723300  | -1.58046500 | H                              | -5.14237500 | 1.02310000  | -1.64092200 |
| H                              | 3.80344200  | -0.37704400 | -2.01692200 | H                              | -4.91388900 | 2.04859200  | -0.22433500 |

|                                |             |             |             |                                |             |             |             |
|--------------------------------|-------------|-------------|-------------|--------------------------------|-------------|-------------|-------------|
| C                              | 4.10646900  | 0.85692400  | 1.05565000  | C                              | -4.62082800 | -1.26097000 | -0.38887100 |
| H                              | 4.70584300  | 0.56689800  | 1.91905100  | H                              | -5.02183400 | -2.07287500 | 0.21849200  |
| H                              | 4.44158400  | 1.84248300  | 0.73024400  | H                              | -5.04659600 | -1.34794900 | -1.38911600 |
| C                              | 3.82423800  | -1.40108500 | 0.34260500  | C                              | -4.44891000 | 0.18017200  | 1.50468800  |
| H                              | 4.10880600  | -2.12816800 | -0.41846600 | H                              | -4.84414200 | 1.08891300  | 1.95950100  |
| H                              | 4.29024000  | -1.69936000 | 1.28249400  | H                              | -4.74886400 | -0.66428200 | 2.12619200  |
| H                              | -0.18913200 | 0.00662700  | 0.42780500  | Br                             | 2.99463900  | 1.60008400  | 0.15434800  |
| Br                             | -1.33098000 | -1.32002100 | -1.32633200 | Br                             | 3.01291500  | -1.58934800 | 0.15759300  |
| Br                             | -1.58508300 | 1.77391800  | -0.59059300 | Br                             | 0.26495700  | -0.01067700 | -0.30813100 |
| Br                             | -2.37266100 | -0.45050700 | 1.56111400  | H                              | 2.38227300  | -0.00001100 | -1.62861600 |
| CHCl <sub>3</sub> -DABCO (HyB) |             |             |             | CHCl <sub>3</sub> -DABCO (HaB) |             |             |             |
| C                              | 2.03809100  | 0.00013900  | 0.10152100  | C                              | 3.08696500  | -0.00121800 | -0.50344800 |
| N                              | -1.05816600 | 0.05327600  | 0.36557000  | N                              | -1.58488400 | -0.29863800 | -0.39288100 |
| C                              | -1.52148100 | -1.34038800 | 0.38763200  | C                              | -1.82258800 | 1.14122000  | -0.53013200 |
| C                              | -1.82733200 | 0.82698200  | 1.34765300  | C                              | -2.61855000 | -1.02498900 | -1.13660400 |
| C                              | -1.29961900 | 0.61114800  | -0.97164600 | C                              | -1.67592500 | -0.66055600 | 1.02491000  |
| N                              | -3.55155600 | -0.05294700 | -0.19332700 | N                              | -3.90046400 | 0.29819900  | 0.51715900  |
| H                              | -0.99370600 | -1.87967000 | -0.40043800 | H                              | -1.00315200 | 1.67322400  | -0.04420000 |
| H                              | -1.24121800 | -1.78461200 | 1.34337300  | H                              | -1.79715700 | 1.38672700  | -1.59284800 |
| H                              | -1.69672700 | 0.35564100  | 2.32243300  | H                              | -2.49234400 | -0.81537000 | -2.19934800 |
| H                              | -1.40865300 | 1.83244700  | 1.40169100  | H                              | -2.45648500 | -2.09268600 | -0.98331200 |
| H                              | -1.02062800 | 1.66540600  | -0.94944200 | H                              | -1.41365600 | -1.71422800 | 1.12984600  |
| H                              | -0.64222000 | 0.10666100  | -1.68231500 | H                              | -0.93235500 | -0.07554800 | 1.56858000  |
| C                              | -3.05809700 | -1.38520900 | 0.17091400  | C                              | -3.19199000 | 1.51359300  | 0.10211300  |
| H                              | -3.57411800 | -1.69812500 | 1.07944300  | H                              | -3.81928400 | 2.05474300  | -0.60707900 |
| H                              | -3.32264800 | -2.08450000 | -0.62276800 | H                              | -3.06049100 | 2.14410700  | 0.98243000  |
| C                              | -3.32346000 | 0.85865400  | 0.93287500  | C                              | -4.02690100 | -0.59320200 | -0.64063200 |
| H                              | -3.62330400 | 1.85991600  | 0.62115500  | H                              | -4.62360100 | -1.45798500 | -0.34837300 |
| H                              | -3.96688100 | 0.55827300  | 1.76035600  | H                              | -4.57111200 | -0.05813800 | -1.41995800 |
| C                              | -2.79378600 | 0.42985100  | -1.35273800 | C                              | -3.11046200 | -0.37919500 | 1.55078200  |
| H                              | -2.90897300 | -0.29809100 | -2.15674200 | H                              | -3.08759300 | 0.25329200  | 2.43895300  |
| H                              | -3.23016300 | 1.37135000  | -1.68750800 | H                              | -3.62223500 | -1.30619800 | 1.81264900  |
| H                              | 1.03095200  | 0.00459200  | 0.51621500  | H                              | 3.46990900  | -0.00160700 | -1.51431100 |
| Cl                             | 2.29464100  | 1.56403300  | -0.67893500 | Cl                             | 1.33974300  | -0.21832700 | -0.56115200 |
| Cl                             | 2.11062500  | -1.30552500 | -1.08766700 | Cl                             | 3.85998300  | -1.32897000 | 0.36894300  |
| Cl                             | 3.21711300  | -0.25960500 | 1.38728300  | Cl                             | 3.50402100  | 1.54958000  | 0.23368500  |
| CHI <sub>3</sub> -DABCO (HyB)  |             |             |             | CHI <sub>3</sub> -DABCO (HaB)  |             |             |             |
| C                              | -0.79508700 | -0.03847900 | -0.02185900 | C                              | 1.72078000  | -0.00017000 | -0.61980300 |
| N                              | 2.26804100  | 0.09817400  | 0.50236500  | N                              | -3.09669500 | -0.00628500 | -0.02812100 |
| C                              | 2.72131600  | 0.35538500  | -0.87118600 | C                              | -3.66314700 | 1.23231400  | -0.57776400 |
| C                              | 2.88736600  | 1.08290300  | 1.39768600  | C                              | -3.69298700 | -1.15873900 | -0.71629100 |
| C                              | 2.70130500  | -1.24782000 | 0.90023300  | C                              | -3.40531300 | -0.08570800 | 1.40570800  |
| N                              | 4.81497200  | -0.07987200 | 0.37032200  | N                              | -5.62176000 | 0.00611700  | 0.30863500  |
| H                              | 2.16827300  | -0.29968600 | -1.54749200 | H                              | -3.14412500 | 2.07710000  | -0.12384800 |
| H                              | 2.46375400  | 1.38563500  | -1.12029000 | H                              | -3.45787300 | 1.24646300  | -1.64871000 |
| H                              | 2.47654000  | 2.06676600  | 1.16833500  | H                              | -3.37822100 | -1.13467200 | -1.75999500 |

|   |             |             |             |   |             |             |             |
|---|-------------|-------------|-------------|---|-------------|-------------|-------------|
| H | 2.60480600  | 0.83045100  | 2.42041500  | H | -3.28820400 | -2.06411300 | -0.26273300 |
| H | 2.26586100  | -1.47968400 | 1.87303000  | H | -2.90097200 | -0.96097800 | 1.81644800  |
| H | 2.29689400  | -1.95556800 | 0.17475500  | H | -2.98819900 | 0.80002600  | 1.88623100  |
| C | 4.25173400  | 0.11559200  | -0.96995100 | C | -5.18827600 | 1.27321000  | -0.28689300 |
| H | 4.75167400  | 0.96337800  | -1.43921300 | H | -5.75521000 | 1.43955000  | -1.20276100 |
| H | 4.47336100  | -0.77383900 | -1.56102100 | H | -5.43109600 | 2.07568800  | 0.40989200  |
| C | 4.42932800  | 1.05569700  | 1.21528000  | C | -5.23927400 | -1.09323900 | -0.58211800 |
| H | 4.93692700  | 0.96415600  | 2.17593000  | H | -5.63472100 | -2.02410700 | -0.17590100 |
| H | 4.78368300  | 1.96824000  | 0.73434800  | H | -5.70812400 | -0.92282600 | -1.55145700 |
| C | 4.25180800  | -1.30680200 | 0.94358600  | C | -4.94455900 | -0.16923300 | 1.59654200  |
| H | 4.62815100  | -2.16082500 | 0.37976700  | H | -5.29447500 | 0.60246700  | 2.28204700  |
| H | 4.61322500  | -1.39599500 | 1.96875500  | H | -5.23534900 | -1.13791600 | 2.00336700  |
| H | 0.22370400  | 0.00004400  | 0.36515800  | H | 1.92864200  | 0.00009000  | -1.68096000 |
| I | -0.89900500 | -1.81078800 | -1.20219900 | I | -0.42196800 | -0.00685600 | -0.34561400 |
| I | -1.00768800 | 1.73364200  | -1.18744300 | I | 2.64937600  | -1.76858300 | 0.14289000  |
| I | -2.11086600 | -0.08420700 | 1.65216700  | I | 2.63662500  | 1.77569900  | 0.14099800  |
